# Supplementary material for: Metagenomic analysis of the cow, sheep, reindeer and red deer rumen
Source: PubMed Central journal article supplement (PMC7820578; doi:10.1038/s41598-021-81668-9), 2021-01-21
Supplement: 41598_2021_81668_MOESM11_ESM.pdf [file 41598_2021_81668_MOESM11_ESM.pdf]

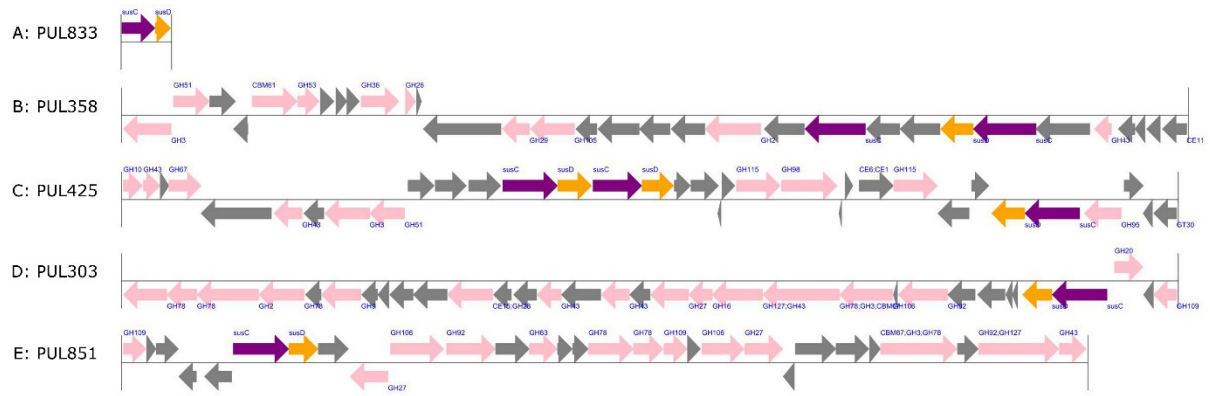

**Supplementary fig 1: Several predicted polysaccharide utilisation loci (PULs). A: The most common PUL consisting of only a *susC/D* pair. B-E: The 4 largest PULs identified in our dataset.**
